# Supplementary material for: Uniform spatial distribution of a nanostructured Ag/AgCl plasmonic photocatalyst and its segregative membrane towards visible light-driven photodegradation
Source: Royal Society of Chemistry journal article supplement (doi:10.1039/c6ce00499g), 2016-01-01
Supplement: c6ce00499g1.pdf [file c6ce00499g1.pdf]

## Supplementary Information for

# Uniform Spatial Distribution of Nanostructured Ag/AgCl Plasmonic Photocatalyst and Its Segregative Membrane towards Visible-light Driven Photodegradation

Xueling Ma,<sup>a</sup> Yuxin Tang,<sup>b</sup> Haijun Tao,<sup>a</sup> Yuekun Lai,<sup>c</sup> Yanyan Zhang,<sup>\*, b</sup> Xinran Zhou,<sup>b</sup> Zhisheng Lv,<sup>b</sup> Zhiqiang Zhu,<sup>b</sup> Jie Tao<sup>\*, a</sup>

<sup>a</sup> College of material science and technology, Nanjing University of Aeronautics and Astronautics, Nanjing 211100, China.

<sup>b</sup> School of Materials Science and Engineering, Nanyang Technological University, 50 Nanyang Avenue, Singapore 639798

<sup>c</sup> National Engineering Laboratory for Modern Silk, College of Textile and Clothing Engineering, Soochow University, Suzhou 215123, China.

## **Experiment section**

### **The synthesis of Ag/AgCl/TMS-400 membrane**

Firstly, tissue paper (commercial household product) was immersed into water followed by violent magnetic stirring for 12 h to break down the tissue paper to obtain the dispersed tissue fibers. Then, 15 mg Ag/AgCl/TMS-400 powder were dispersed into 3 mg tissue fibre suspension with 1 h stirring. Finally, the free-standing membrane was obtained by vacuum filtration of the mixture suspension.

### **Photocatalytic experiment for Ag/AgCl/TMS-400 membrane**

For the measurement of the photocatalytic activity of as-prepared Ag/AgCl/TMS-400 membrane, MO and MB were selected as the target organic pollutants. The illumination source for the measurement was the same with the powder test. The as-prepared membrane was placed into 20 mL aqueous solution of MO (4 mg/L) and MB (5 mg/L) for 1 h in dark for the adsorption/desorption equilibrium of organic dye. 2 mL solution was taken out every 1 h and the UV-vis absorption spectra of the residual MO and MB solution were analysed by a Shimadzu 2550 UV-vis spectrometer. The concentrations were obtained from the absorption intensity at the peak of MO (463 nm) and MB (562 nm) in the UV-vis absorption spectra.

**Figure S1**

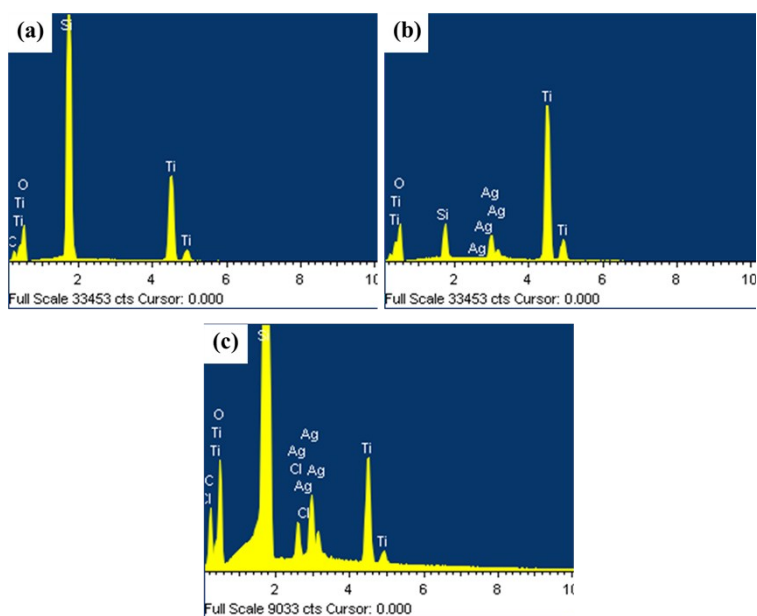

**Figure S1.** The EDX spectra of (a) H-TMS, (b) Ag-TMS, (c) AgCl/TMS (the peak of Si element came from the substrate for holding the samples).

**Figure S2**

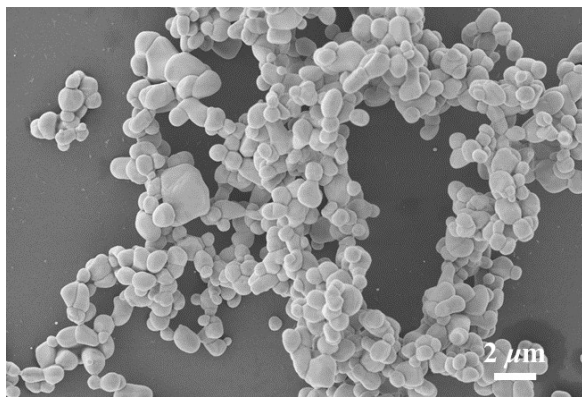

**Figure S2.** FESEM image for AgCl NPs prepared by traditional method.

**Figure S3**

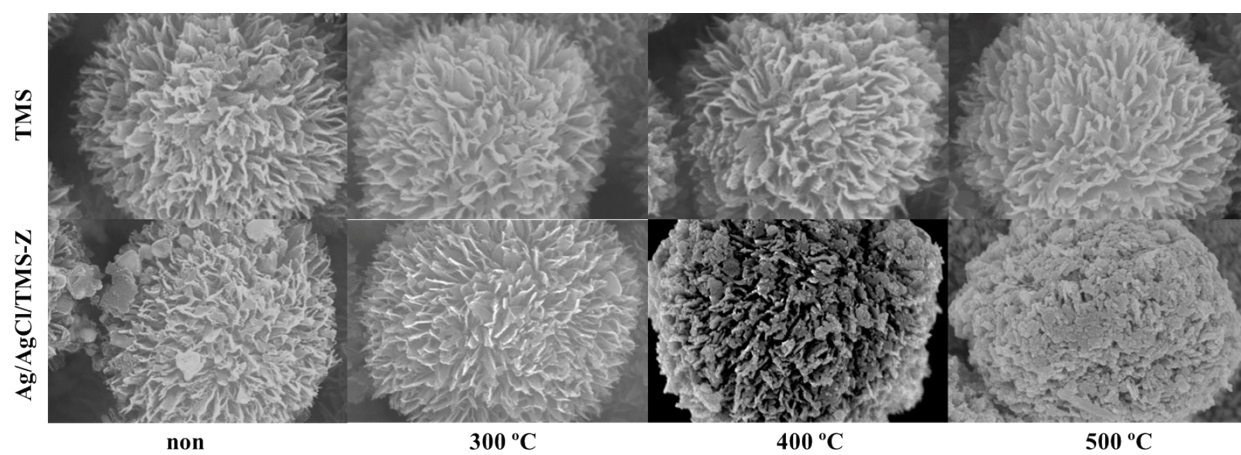

**Figure S3.** FESEM images for H-TMS and Ag/AgCl/TMS with heat treatment of non-heat, 300 °C, 400 °C, 500 °C respectively.

**Figure S4**

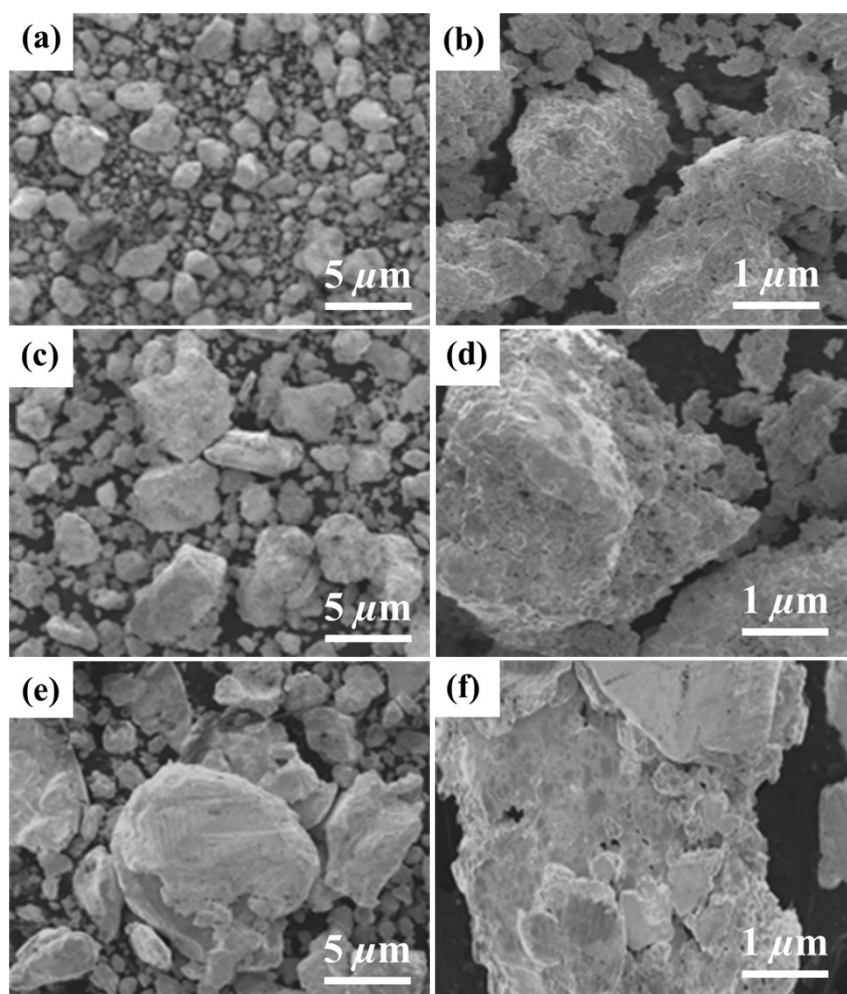

**Figure S4.** FESEM images for AgCl particles with (a, b) non-heat treatment, (c, d) 300 °C heat treatment, (e, f) 400 °C heat treatment.

**Figure S5**

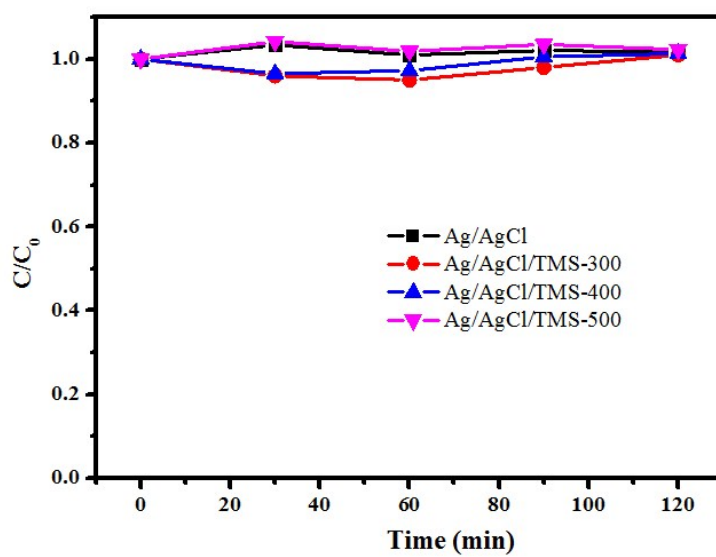

**Figure S5.** Absorption curves of MO on the different photocatalysts under dark condition.

**Figure S6**

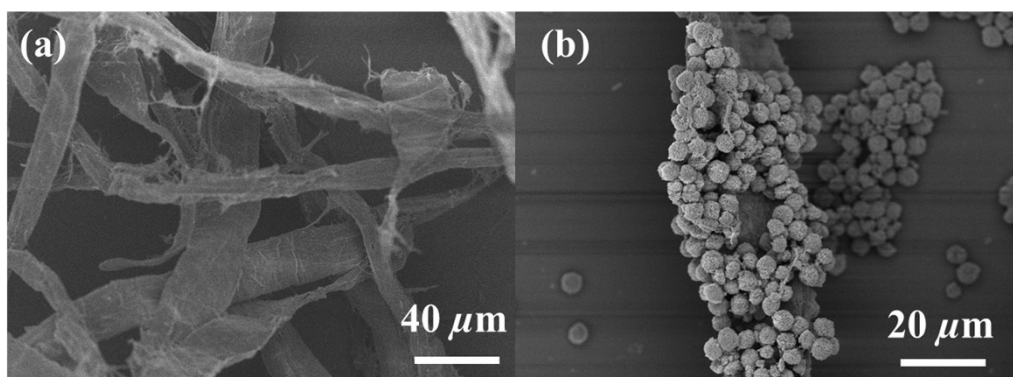

**Figure S6.** FESEM images for (a) tissue fibres after violent magnetic stirring, (b) dispersive tissue fibre with the attachment of Ag/AgCl/TMS-400 on the surface.

**Table S1****Table S1.** The BET surface area and average pore radius of samples

|                 | BET Surface Area (m <sup>2</sup> /g) | Average Pore Radius (nm) |
|-----------------|--------------------------------------|--------------------------|
| H-TMS           | 241                                  | 4.7                      |
| Ag/AgCl/TMS-non | 237                                  | 5.3                      |
| Ag/AgCl/TMS-300 | 134                                  | 11.7                     |
| Ag/AgCl/TMS-400 | 91                                   | 15.8                     |
| Ag/AgCl/TMS-500 | 69                                   | 20.3                     |
